# Supplementary material for: The effects of TNF‐α/TNFR2 in regulatory T cells on the microenvironment and progression of gastric cancer
Source: PubMed Central journal article supplement — Int J Cancer. 2021 Nov 16;150(8):1373–91. doi: 10.1002/ijc.33873 (PMC9298834; doi:10.1002/ijc.33873), 2021-11-16
Supplement: IJC-150-1373-s001.pdf [file IJC-150-1373-s001.pdf]

# The effects of TNF- $\alpha$ /TNFR2 in regulatory T cells on the microenvironment and progression of gastric cancer

Yang Qu, Xianhao Wang, Shuai Bai, Liling Niu, Gang Zhao, Yuan Yao, Bin Li, Hui Li

## Table of Content

|                        |   |
|------------------------|---|
| Supplementary Table S1 | 2 |
| Supplementary Table S2 | 2 |
| Supplementary Table S3 | 2 |
| Fig.S1                 | 3 |
| Fig.S2                 | 6 |

### Supplementary Table S1 Purification and RNA-Sequencing of Tregs in GC patients

| Tissue | Subset                | Sorting phenotype                                     | Number of collected cells |
|--------|-----------------------|-------------------------------------------------------|---------------------------|
| Tumor  | CD4 <sup>+</sup> Treg | CD4 <sup>+</sup> CD25 <sup>+</sup> CD127 <sup>-</sup> | 7252                      |
| Blood  | CD4 <sup>+</sup> Treg | CD4 <sup>+</sup> CD25 <sup>+</sup> CD127 <sup>-</sup> | 2340                      |

Tumor tissue and peripheral blood were collected from three GC patients (2 men and 1 woman) for scRNA sequencing. Tissue of origin, cell subsets, surface marker combinations used for sorting, as well as number of collected cells are indicated.

### Supplementary Table S2. The sequencing coverage and quality statistics

| Sample ID    | Total number of sequenced reads per sample | Total number of uniquely mapped reads per sample* | Total number of called cells | Median number (and range) of uniquely mapped reads per called cell | Median rRNA rate (and range) per called cell | Median number (and range) of detected genes per called cell |
|--------------|--------------------------------------------|---------------------------------------------------|------------------------------|--------------------------------------------------------------------|----------------------------------------------|-------------------------------------------------------------|
| N712         | 547680763                                  | 214392981.4                                       | 2824                         | 53012 (17601 - 250858)                                             | 0.401204 (0.001744 - 0.823044)               | 1162 (70 - 3690)                                            |
| N711         | 500941463                                  | 99316630.49                                       | 545                          | 80623 (28059 - 1250357)                                            | 0.0149792 (0.0000551 - 0.6505409)            | 655 (42 - 4171)                                             |
| pbmc         | 509299528                                  | 297941995.1                                       | 11192                        | 19888 (7052 - 145472)                                              | 0.1319728 (0.0005069 - 0.4250594)            | 1025 (36 - 3585)                                            |
| tumour       | 672216281                                  | 412062890                                         | 7816                         | 37703 (13080 - 892712)                                             | 0.0921786 (0.0001285 - 0.3023369)            | 1093 (44 - 5819)                                            |
| blood_566709 | 563624569                                  | 271459202.9                                       | 2735                         | 85141 (18680 - 342302)                                             | 0.2137984 (0.0001346 - 0.4082517)            | 1217 (67 - 3801)                                            |
| tumor_566709 | 1686069446                                 | 563854524.6                                       | 697                          | 271137 (103066 - 29392094)                                         | 0.0003975 (0 - 0.5643967)                    | 249 (43 - 4347)                                             |

\*GRCh38 was the reference genome.

### Supplementary Table S3 Multivariate Cox regression analysis of the level of TNFR2+ Tregs infiltration on the influence of OS and DFS in gastric cancer patients

| Variables               | OS      |               |             | DFS     |               |              |
|-------------------------|---------|---------------|-------------|---------|---------------|--------------|
|                         | P value | Hazard Ratio* | 95.0% CI    | P value | Hazard Ratio* | 95.0% CI     |
| Age                     | 0.482   | 1.163         | 0.763-1.775 | 0.652   | 1.099         | 0.729-1.659  |
| Gender                  | 0.25    | 0.769         | 0.492-1.203 | 0.878   | 1.035         | 0.667-1.607  |
| N stage                 | 0.484   | 1.13          | 0.802-1.593 | 0.608   | 1.081         | 0.803-1.455  |
| TNM stage               | 0.025   | 1.512         | 1.054-2.169 | 0.024   | 1.445         | 1.0491-1.990 |
| TNFR2 <sup>+</sup> Treg | 0.001   | 2.259         | 1.408-3.624 | <0.001  | 2.88          | 1.787-4.640  |

OS: overall survival; HR: Hazard ratio; DFS: Disease-free survival. \*HR adjusted for age, gender, N stage, and TNM stage.

(A)

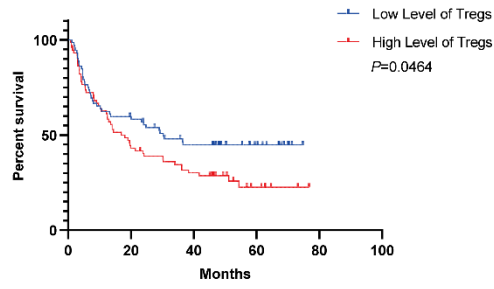

(B)

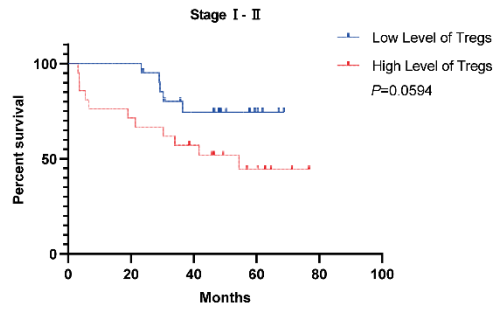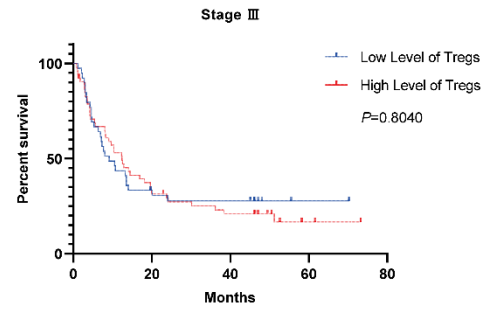

(C)

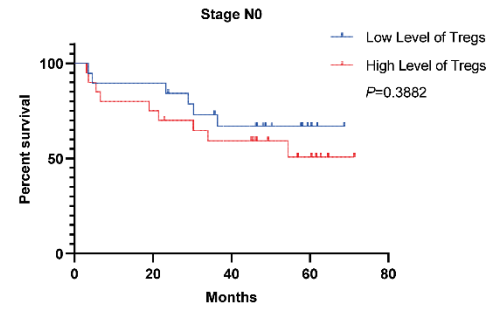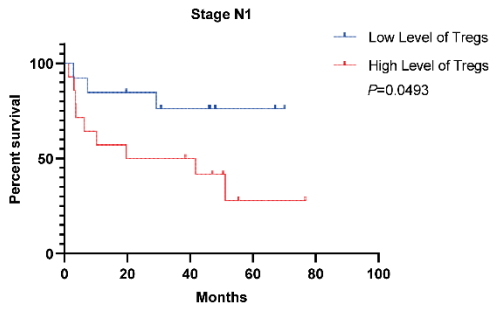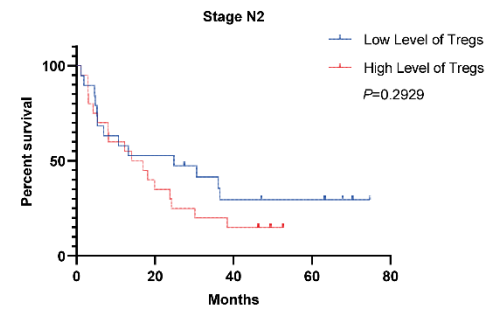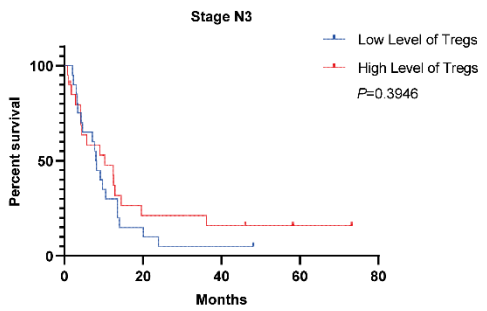

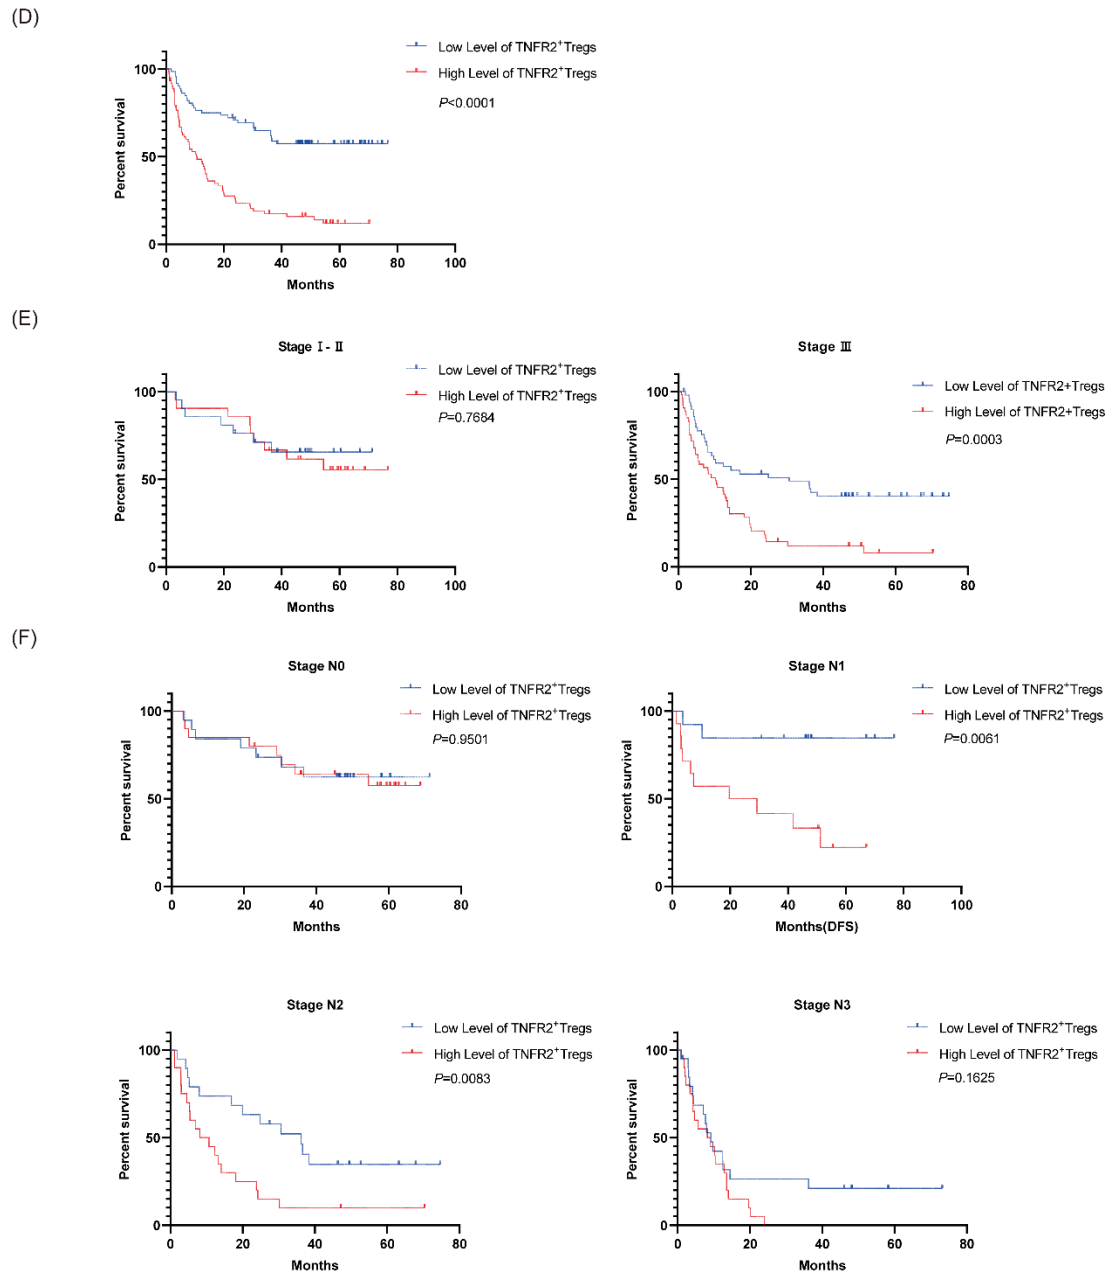

**Fig. S1**

**Correlations of the Treg and TNFR2<sup>+</sup> Treg infiltration levels with DFS**

(A) Patients were divided into high- and low-infiltration groups according to the median Treg infiltration ratio. The Kaplan-Meier survival curves showed a difference in the DFS between patients with high and low levels of tumor-infiltrating Tregs (log-rank test,  $P < 0.05$ ).

(B) Subgroup analysis. The DFS curves for patients stratified by TNM stage were compared between patients with high and low levels of tumor-infiltrating Tregs (log-rank

test,  $P < 0.05$ ).

(C) Subgroup analysis. The DFS curves for patients stratified by N stage were compared between patients with high and low levels of tumor-infiltrating Tregs (log-rank test,  $P < 0.05$ ).

(D) Patients were divided into high- and low-infiltration groups according to the median TNFR2<sup>+</sup> Treg infiltration ratio. The Kaplan-Meier survival curves showed a difference in the DFS between patients with high and low levels of tumor-infiltrating TNFR2<sup>+</sup> Tregs (log-rank test,  $P < 0.05$ ).

(E) Subgroup analysis. The DFS curves for patients stratified by TNM stage were compared between patients with high and low levels of tumor-infiltrating TNFR2<sup>+</sup> Tregs (log-rank test,  $P < 0.05$ ).

(F) Subgroup analysis. The DFS curves for patients stratified by N stage were compared between patients with high and low levels of tumor-infiltrating TNFR2<sup>+</sup> Tregs (log-rank test,  $P < 0.05$ ).

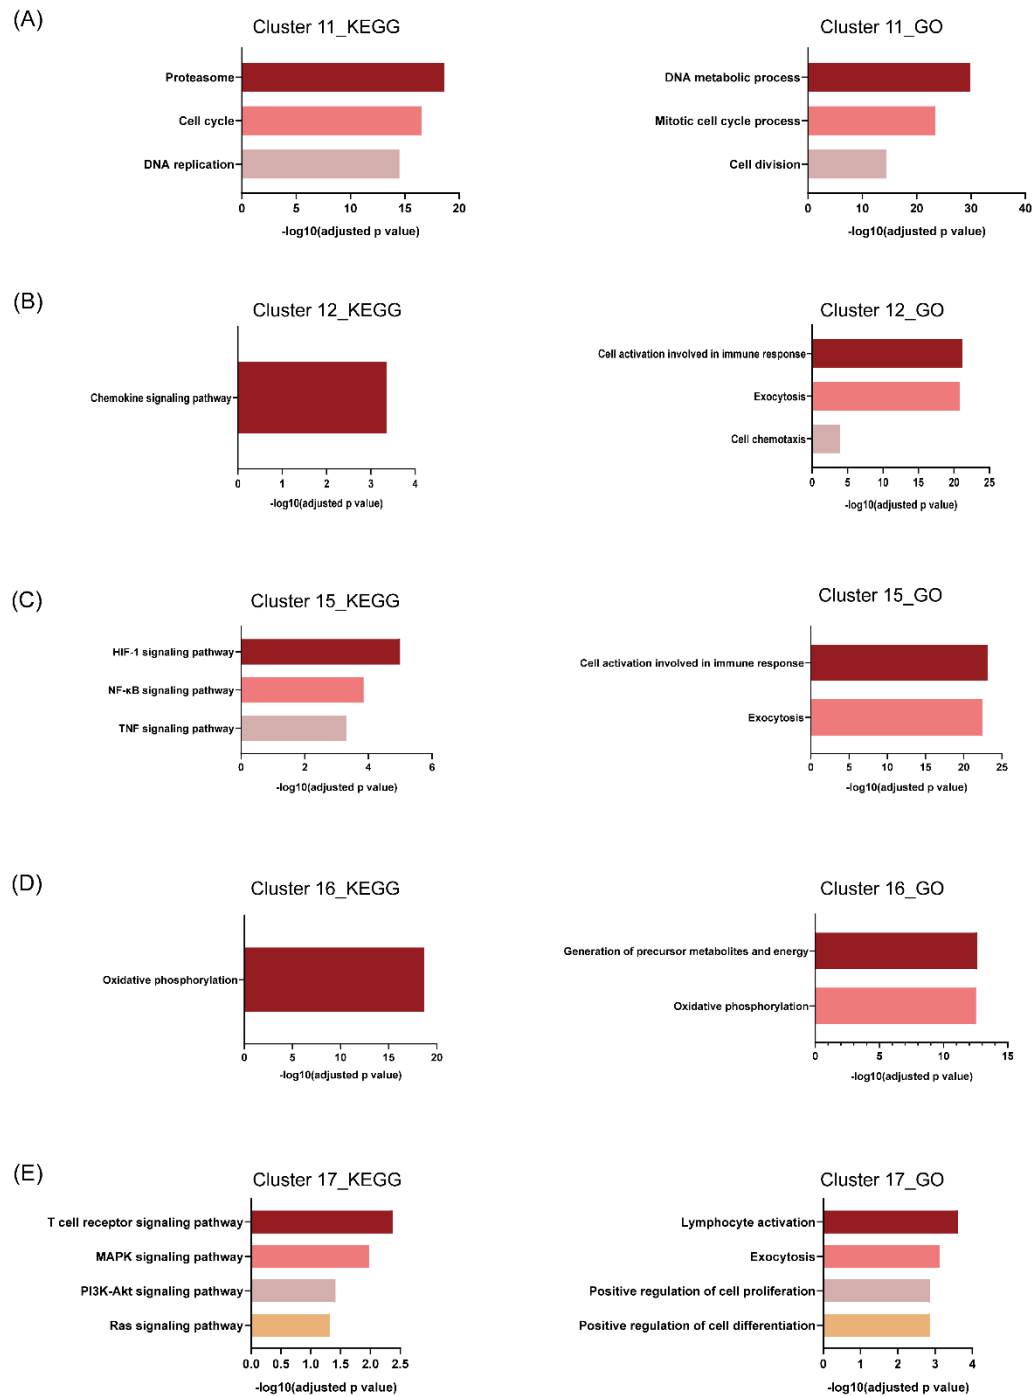

**Fig. S2**

**Enrichment analysis**

(A-E) KEGG and GO enrichment analyses of the upregulated genes in clusters 11, 12, 15, 16 and 17 after merging and reclustered all Tregs. In these clusters, tumor-infiltrating Tregs accounted for more than 95% of the total Treg population.
